# Supplementary material
Source: PubMed Central journal article supplement (PMC7265172)

## Supplementary Figure Legends

### Supplementary Figure 1, related to Figure 1. Ablation of *Gclc* does not impair Treg cell expansion.

Naïve T cells were isolated from *Gclc<sup>fl/fl</sup>* and *Foxp3<sup>cre</sup>-Gclc<sup>fl/fl</sup>* mice and induced to differentiate *in vitro* into Th0 cells by incubation with anti-( $\alpha$ )CD3 antibody plus  $\alpha$ CD28 and IL2, or into iTregs by incubation with  $\alpha$ CD3,  $\alpha$ CD28, IL2, and TGF $\beta$ . **(A)** Intracellular staining and flow cytometric analysis of phosphorylated Stat5 (p-Stat5) in iTregs of the indicated genotypes. Data are the mean  $\pm$  SEM (n=3) and representative of three independent trials. **(B)** Analysis of FSC and SSC of the iTregs in (A). Data are the mean  $\pm$  SEM (n=3) and representative of five independent trials. **(C)** Intracellular staining and flow cytometric analysis of CD4<sup>+</sup>Foxp3<sup>+</sup> cells induced to differentiate into iTregs under suboptimal conditions. Data are the mean  $\pm$  SEM (n=3) and representative of three independent trials. **(D)** RT-qPCR to measure *Gclc* mRNA expression in *Gclc<sup>fl/fl</sup>* and *Foxp3<sup>cre</sup>-Gclc<sup>fl/fl</sup>* iTregs. Data are the mean  $\pm$  SEM (n=3) and representative of three independent trials. **(E)** Mass-spectrometry based analysis of GSSG/GSH ratio in *Gclc<sup>fl/fl</sup>* and *Foxp3<sup>cre</sup>-Gclc<sup>fl/fl</sup>* iTregs. Data are the mean  $\pm$  SEM (n=3) and representative of two independent trials. **(F)** Flow cytometric analysis of ROS in *Gclc<sup>fl/fl</sup>* and *Foxp3<sup>cre</sup>-Gclc<sup>fl/fl</sup>* iTregs as detected by DCF-DA staining. Data are the mean  $\pm$  SEM (n=3) and representative of three independent trials. **(G)** Flow cytometric analysis of CD4<sup>+</sup>Foxp3<sup>+</sup> nTregs isolated from thymus of 4 week old *Gclc<sup>fl/fl</sup>* and *Foxp3<sup>cre</sup>-Gclc<sup>fl/fl</sup>* mice. Data are the mean  $\pm$  SEM (n=3) and representative of three independent trials. **(H)** Representative images of 8 week old *Gclc<sup>fl/fl</sup>* control and *Foxp3<sup>cre</sup>-Gclc<sup>fl/fl</sup>* mice. **(I)** Histological analysis of H&E- stained sections of liver, lung and skin of 8 week old *Gclc<sup>fl/fl</sup>* and *Foxp3<sup>cre</sup>-Gclc<sup>fl/fl</sup>* mice. Scale bars, 500  $\mu$ m. Data are representative of three mice/group. **(J)** Sections of the skin and lung tissues from the mice in (G) were stained with  $\alpha$ Mac-3 to detect macrophages. Scale bars, 500  $\mu$ m. Data are representative of three mice/group. \*p < 0.05.

### Supplementary Figure 2, related to Figure 2. *Foxp3<sup>cre</sup>-Gclc<sup>fl/fl</sup>* mice develop spontaneous autoimmunity.

**(A-B)** Quantification of total naïve (CD44<sup>lo</sup> CD62L<sup>hi</sup>) and effector (CD44<sup>hi</sup> CD62L<sup>lo</sup>) subsets of CD4<sup>+</sup> (left) and CD8<sup>+</sup> (right) T cells isolated from **(A)** spleen and **(B)** lymph nodes (LN) of *Gclc<sup>fl/fl</sup>* control and *Foxp3<sup>cre</sup>-Gclc<sup>fl/fl</sup>* mice. Data are the mean  $\pm$  SEM (n=3) and representative

of three independent trials. **(C)** Splenic T cells from female *Foxp3<sup>cre</sup>-GclC<sup>fl/fl</sup>* and *GclC<sup>fl/fl</sup>* mice were analyzed by flow cytometry to quantify effector and naïve T cells as in (A). Data are the mean ± SEM (n=3) and representative of three independent trials. **(D)** Flow cytometric analysis of Tbet expression of splenic CD4<sup>+</sup> T cells of *GclC<sup>fl/fl</sup>* and *Foxp3<sup>cre</sup>-GclC<sup>fl/fl</sup>* mice. Data are the mean ± SEM (n=3) and representative of five independent trials. **(E-G)** T cells were isolated from the colonic lamina propria of *GclC<sup>fl/fl</sup>* and *Foxp3<sup>cre</sup>-GclC<sup>fl/fl</sup>* mice and analyzed by flow cytometry to quantify **(E)** CD4<sup>+</sup> and CD8<sup>+</sup> T cells, **(F)** effector (CD44<sup>hi</sup> CD62L<sup>lo</sup>) CD4<sup>+</sup> and CD8<sup>+</sup> T cells, and **(G)** IFN $\gamma$ -producing CD4<sup>+</sup> T cells. Data are the mean ± SEM (n=3) and representative of three independent trials. **(H-I)** Flow cytometric analysis of **(H)** CD4<sup>+</sup> CXCR5<sup>+</sup> PD1<sup>+</sup> follicular T helper cells and **(I)** CD19<sup>+</sup> B220<sup>+</sup> CD95<sup>+</sup> GL-7<sup>+</sup> GC B cells among splenocytes of 8 week old *GclC<sup>fl/fl</sup>* and *Foxp3<sup>cre</sup>-GclC<sup>fl/fl</sup>* mice. Data are the mean ± SEM (n=3) and representative of five independent trials. **(J)** ELISA to detect IgG1, IgG2a, IgG3, and IgA in serum of 8 week old *GclC<sup>fl/fl</sup>* and *Foxp3<sup>cre</sup>-GclC<sup>fl/fl</sup>* mice. Each symbol represents an individual mouse. Data are the mean ± SEM (n=11) and representative of two independent trials. \*p < 0.05.

**Supplementary Figure 3, related to Figure 3. An absence of *GclC* does not affect Treg stability but does impair suppressive capacity.**

**(A)** Flow cytometric determination of the expression of the indicated surface markers by *GclC<sup>fl/fl</sup>* and *Foxp3<sup>cre</sup>-GclC<sup>fl/fl</sup>* iTregs. Data are representative of 4 trials. **(B)** Intracellular staining and flow cytometric analysis of Helios (top) and IRF4 (bottom) *GclC<sup>fl/fl</sup>* and *Foxp3<sup>cre</sup>-GclC<sup>fl/fl</sup>* iTregs. Data are the mean ± SEM (n=3) and representative of three independent trials. **(C)** *In vitro* suppression assay of iTregs that were incubated with control Tconv at the indicated ratios for 48 hr. Tconv proliferation was determined by <sup>3</sup>H-thymidine incorporation. Data are the mean ± SEM (n=3) and representative of three independent trials. **(D)** *In vitro* assay of suppressive activity of *GclC<sup>fl/fl</sup>* and *Foxp3<sup>cre</sup>-GclC<sup>fl/fl</sup>* iTregs incubated at the indicated ratios with Tconv labeled with Cell-Trace Violet (CTV). Suppression was determined by flow cytometry as a decrease in Tconv proliferation. Data are representative of five independent trials. **(E)** RT-qPCR measurement of IL-10 mRNA levels in *GclC<sup>fl/fl</sup>* and *Foxp3<sup>cre</sup>-GclC<sup>fl/fl</sup>* iTregs (left). Intracellular staining and flow cytometric determination of TGF- $\beta$  production by *GclC<sup>fl/fl</sup>* and *Foxp3<sup>cre</sup>-GclC<sup>fl/fl</sup>* iTregs (right). Data are the mean ± SEM (n=3) and representative of three independent trials. \*p < 0.05.

**Supplementary Figure 4, related to Figure 4. mTOR blockade restores immune homeostasis and Treg function in *Gclc*-deficient mice.**

**(A)** Principal component (PC) analysis of RNA-seq data of iTregs of the indicated genotypes. **(B)** Volcano plot comparing mRNA levels of the indicated Treg-associated genes in *Foxp3<sup>cre</sup>-Gclc<sup>fl/fl</sup>* and *Gclc<sup>fl/fl</sup>* iTregs. Downregulated (blue) and upregulated (red) transcripts are shown. **(C)** Flow cytometric analysis of p-mTOR and pS6 in splenic T cells isolated from YFP<sup>+</sup> and YFP<sup>-</sup> female *Gclc<sup>fl/fl</sup>* and *Foxp3<sup>cre</sup>-Gclc<sup>fl/fl</sup>* mice. Data are the mean ± SEM (n=3) and representative of two independent trials. **(D)** Intracellular staining and flow cytometric analysis of pS6 and Foxp3 in *Gclc<sup>fl/fl</sup>* and *Foxp3<sup>eGPF-cre-ERT2</sup>-Gclc<sup>fl/fl</sup>* iTregs incubated with 4-OHT. Data are the mean ± SEM (n=3) and representative of three independent trials. **(E)** *In vitro* assay of suppressive activity of *Gclc<sup>fl/fl</sup>* and *Foxp3<sup>eGPF-cre-ERT2</sup>-Gclc<sup>fl/fl</sup>* iTregs that were incubated with 4-OHT prior to incubation with CTV-labeled Tconv at the indicated ratios. Data are representative of three independent trials. **(F)** *In vitro* assay of suppressive activity of *Gclc<sup>fl/fl</sup>* and *Foxp3<sup>cre</sup>-Gclc<sup>fl/fl</sup>* iTregs that were transduced with retrovirus expressing empty vector (EV) or Stat5 and incubated with CTV-labeled Tconv at the indicated ratios. Data are representative of two independent trials. \*p<0.05. **(G-L)** *Gclc<sup>fl/fl</sup>* and *Foxp3<sup>cre</sup>-Gclc<sup>fl/fl</sup>* mice (8 weeks old) were i.p.-injected with vehicle or rapamycin every other day for 30 days, followed by sacrifice on day 30. Splenic T cells were isolated and subjected to flow cytometric analysis to identify **(G)** naïve (CD44<sup>lo</sup> CD62L<sup>hi</sup>) and effector (CD44<sup>hi</sup> CD62L<sup>lo</sup>) subsets of CD4<sup>+</sup> (top) and CD8<sup>+</sup> (bottom) T cells, **(H)** CD4<sup>+</sup> CXCR5<sup>+</sup> PD-1<sup>+</sup> Tfh cells, **(I)** CD19<sup>+</sup> B220<sup>+</sup> CD95<sup>+</sup> GL-7<sup>+</sup> GC B cells, **(J)** Tbet expression, and **(K)** IFN $\gamma$  expression. **(L)** Histological analysis of lung tissues that were resected from one *Gclc<sup>fl/fl</sup>* and one *Foxp3<sup>cre</sup>-Gclc<sup>fl/fl</sup>* male mouse and stained with H&E (top) or  $\alpha$ CD3 to detect T cells (bottom). Scale bars, 500  $\mu$ m. Results are representative of 4 mice per group and two independent trials. **(M)** *In vitro* suppression assay of iTregs derived from *Gclc<sup>fl/fl</sup>* and *Foxp3<sup>cre</sup>-Gclc<sup>fl/fl</sup>* mice, incubated with or without rapamycin prior to co-incubation with control Tconv labeled with Cell-Trace Violet (CTV) at the indicated ratios. Data are representative of three independent trials. **(N)** Flow cytometric determination of transduction efficiency as determined by CD90.1 expression by the retrovirally transduced *Gclc<sup>fl/fl</sup>* and *Foxp3<sup>cre</sup>-Gclc<sup>fl/fl</sup>* iTregs. **(O)** *In vitro* suppression assay of iTregs of *Gclc<sup>fl/fl</sup>* and *Foxp3<sup>cre</sup>-Gclc<sup>fl/fl</sup>* mice that were transduced with retrovirus expressing EV or Foxp3 and incubated with CTV-labeled Tconv at the indicated ratios. Data are

representative of three independent trials. For (G-K), data are the mean  $\pm$  SEM (n=3) and representative of two independent trials. \*p < 0.05.

**Supplementary Figure 5, related to Figure 4. GSH modulates one-carbon metabolism and Nrf2 signaling.**

**(A)** Barcode enrichment plot of the KEGG pathway GO:0006520 (Cellular amino acid metabolic processes) for *Gclc<sup>fl/fl</sup>* and *Foxp3<sup>cre</sup>-Gclc<sup>fl/fl</sup>* nTregs. **(B)** Barcode enrichment plot of the KEGG pathway GO:0006730 (One-carbon metabolic process) of *Gclc<sup>fl/fl</sup>* and *Foxp3<sup>cre</sup>-Gclc<sup>fl/fl</sup>* nTregs. **(C)** Intracellular staining and flow cytometric analysis of pS6 (left) and Foxp3 (right) in *Gclc<sup>fl/fl</sup>* and *Foxp3<sup>cre</sup>-Gclc<sup>fl/fl</sup>* iTregs that were induced in normal or glycine-deficient medium. Data are the mean  $\pm$  SEM (n=3) and representative of three independent trials. **(D)** Intracellular staining and flow cytometric analysis of Foxp3 in *Gclc<sup>fl/fl</sup>* and *Foxp3<sup>cre</sup>-Gclc<sup>fl/fl</sup>* iTregs that were cultured in serine-deficient medium for the indicated times. Data are the mean  $\pm$  SEM (n=3) and representative of three independent trials. **(E)** RT-qPCR to measure *ASCT2* mRNA expression in *Gclc<sup>fl/fl</sup>* and *Foxp3<sup>cre</sup>-Gclc<sup>fl/fl</sup>* iTregs. Data are the mean  $\pm$  SEM (n=7) and representative of two independent trials. **(F)** Barcode enrichment plot of the KEGG pathway GO:0072593 (reactive oxygen species metabolic process) of *Gclc<sup>fl/fl</sup>* and *Foxp3<sup>cre</sup>-Gclc<sup>fl/fl</sup>* iTregs (top) and nTregs (bottom). **(G)** Heatmap showing normalized differential gene expression levels of NRF2 target genes in *Gclc<sup>fl/fl</sup>* and *Foxp3<sup>cre</sup>-Gclc<sup>fl/fl</sup>* iTregs (left) and nTregs (right). **(H)** Intracellular staining and flow cytometric analysis to detect Foxp3 in *Gclc<sup>fl/fl</sup>* and *Foxp3<sup>cre</sup>-Gclc<sup>fl/fl</sup>* iTregs cultured in normal medium, or treated with 100 $\mu$ M NAC or 0.5mM GSH. Data are the mean  $\pm$  SEM (n=3) and representative of three independent trials. **(I)** Quantification of serine in *Gclc<sup>fl/fl</sup>* and *Foxp3<sup>cre</sup>-Gclc<sup>fl/fl</sup>* iTregs cultured in normal medium with/without 50 $\mu$ M L-phenylglycine. Data are the mean  $\pm$  SEM (n=3) and representative of three independent trials. **(J)** *Asct1* mRNA expression (left) and intracellular staining and flow cytometric analysis of FoxP3 (right) of *Gclc<sup>fl/fl</sup>* vs *Foxp3<sup>cre</sup>-Gclc<sup>fl/fl</sup>* iTregs that were nucleofected with *ASCT1*-specific sgRNAs or controls. Data are the mean  $\pm$  SEM (n=3) and representative of two independent trials. **(K)** Quantitation of formate secretion by *Gclc<sup>fl/fl</sup>* and *Foxp3<sup>cre</sup>-Gclc<sup>fl/fl</sup>* iTregs that were left untreated or treated with 10 $\mu$ M SHMT inhibitor. Data are the mean  $\pm$  SEM (n=3) and representative of two independent trials. **(L)** Intracellular staining and flow cytometric analysis to detect Foxp3 in *Gclc<sup>fl/fl</sup>* and *Foxp3<sup>cre</sup>-Gclc<sup>fl/fl</sup>* iTregs that were left untreated or treated with 10 $\mu$ M SHIN2. Data are the mean  $\pm$  SEM (n=3) and representative of three independent trials. **(M)** Determination by <sup>3</sup>H-

thymidine incorporation of the proliferation of iTregs treated as in (H). Data are the mean  $\pm$  SEM (n=3) and representative of three independent trials. \*p < 0.05.

**Supplementary Figure 6, related to Figure 6. Glutathione controls glycolysis and the TCA cycle in Tregs.**

(A) Flow cytometric analysis and quantitation of Glut-1 protein in *Gclc<sup>fl/fl</sup>* and *Foxp3<sup>cre</sup>-Gclc<sup>fl/fl</sup>* iTregs. Data are the mean  $\pm$  SEM (n=3) and representative of four independent trials. (B) Left: Scheme depicting glycolysis and the TCA cycle. Right: Quantitation of relative mass isotopomer distribution of citrate following incubation of the cells in (A) with [U-<sup>13</sup>C<sub>6</sub>]-glucose for 24 hr. Data are the mean  $\pm$  SEM (n=3) and representative of two independent trials. (C) Intracellular staining and flow cytometric analysis to detect c-MYC expression by *Gclc<sup>fl/fl</sup>* and *Foxp3<sup>cre</sup>-Gclc<sup>fl/fl</sup>* iTregs. Data are the mean  $\pm$  SEM (n=3) and representative of three independent trials. (D) Intracellular staining and flow cytometric analysis to detect Foxp3+ cells among WT T cells that were transduced with retrovirus expressing empty vector (EV) or Foxp3. Data are the mean  $\pm$  SEM (n=3) and representative of three independent trials. \*p < 0.05.

**Supplementary Figure 7, related to Figure 7: GSH depletion in human Tregs interferes with FoxP3 expression and Treg functionality.**

(A) Mass isotopomer distribution of M+3 serine (left) and M+2 glutathione (right) in WT murine iTregs that were cultured with or without serine and incubated with [U-<sup>13</sup>C<sub>6</sub>]-glucose for 24 hr. Data are the mean  $\pm$  SEM (n=4). (B-D) Naïve human T cells were isolated from among PBMCs from healthy donors and induced to differentiate into iTregs in the presence or absence of BSO. (B) Luminescence based quantification of GSH. Data are the mean  $\pm$  SEM (n=4). (C, D) Intracellular staining and flow cytometric analysis to detect (C) Foxp3 and (D) pS6 in human iTregs cultured with/without BSO. Data are the mean  $\pm$  SEM (n=3-4) and representative of two independent trials. (E, F) Intracellular staining and flow cytometric analysis to detect (E) pS6 expression and (F) Foxp3 in human iTregs cultured with/without BSO and with/without serine, as indicated. Data are the mean  $\pm$  SEM (n=3-4) and representative of two independent trials. (G) Intracellular staining and flow cytometric analysis to detect Foxp3 in human iTregs that were cultured with/without BSO, with/without L-phenylglycine, and with/without PHGDH inhibitor, as indicated. Data are the mean  $\pm$  SEM (n=3-4) and representative of two independent trials. (H) *In vitro* assay of suppressive

activity of human iTregs that were induced with/without BSO and incubated at the indicated ratios with human Tconv labeled with Cell-Trace Violet (CTV). Suppression was determined by flow cytometry as decreased Tconv proliferation. Data are representative of two independent trials. **(I-K)** *Gclc<sup>fl/fl</sup>* and *Foxp3<sup>cre</sup>-Gclc<sup>fl/fl</sup>* mice (8 weeks old) were transplanted subcutaneously with MC38 colon adenocarcinoma cells. **(I)** Mean tumor volumes were determined at the indicated times. **(J)** Quantification of tumor weights (left) and representative macroscopic images (right) of tumors from *Gclc<sup>fl/fl</sup>* and *Foxp3<sup>cre</sup>-Gclc<sup>fl/fl</sup>* mice at time of sacrifice. **(K)** Quantification of the indicated subsets of TILs in tumors of *Gclc<sup>fl/fl</sup>* and *Foxp3<sup>cre</sup>-Gclc<sup>fl/fl</sup>* mice treated as in I. Data are mean  $\pm$  SEM (n=5). \*p<0.05.

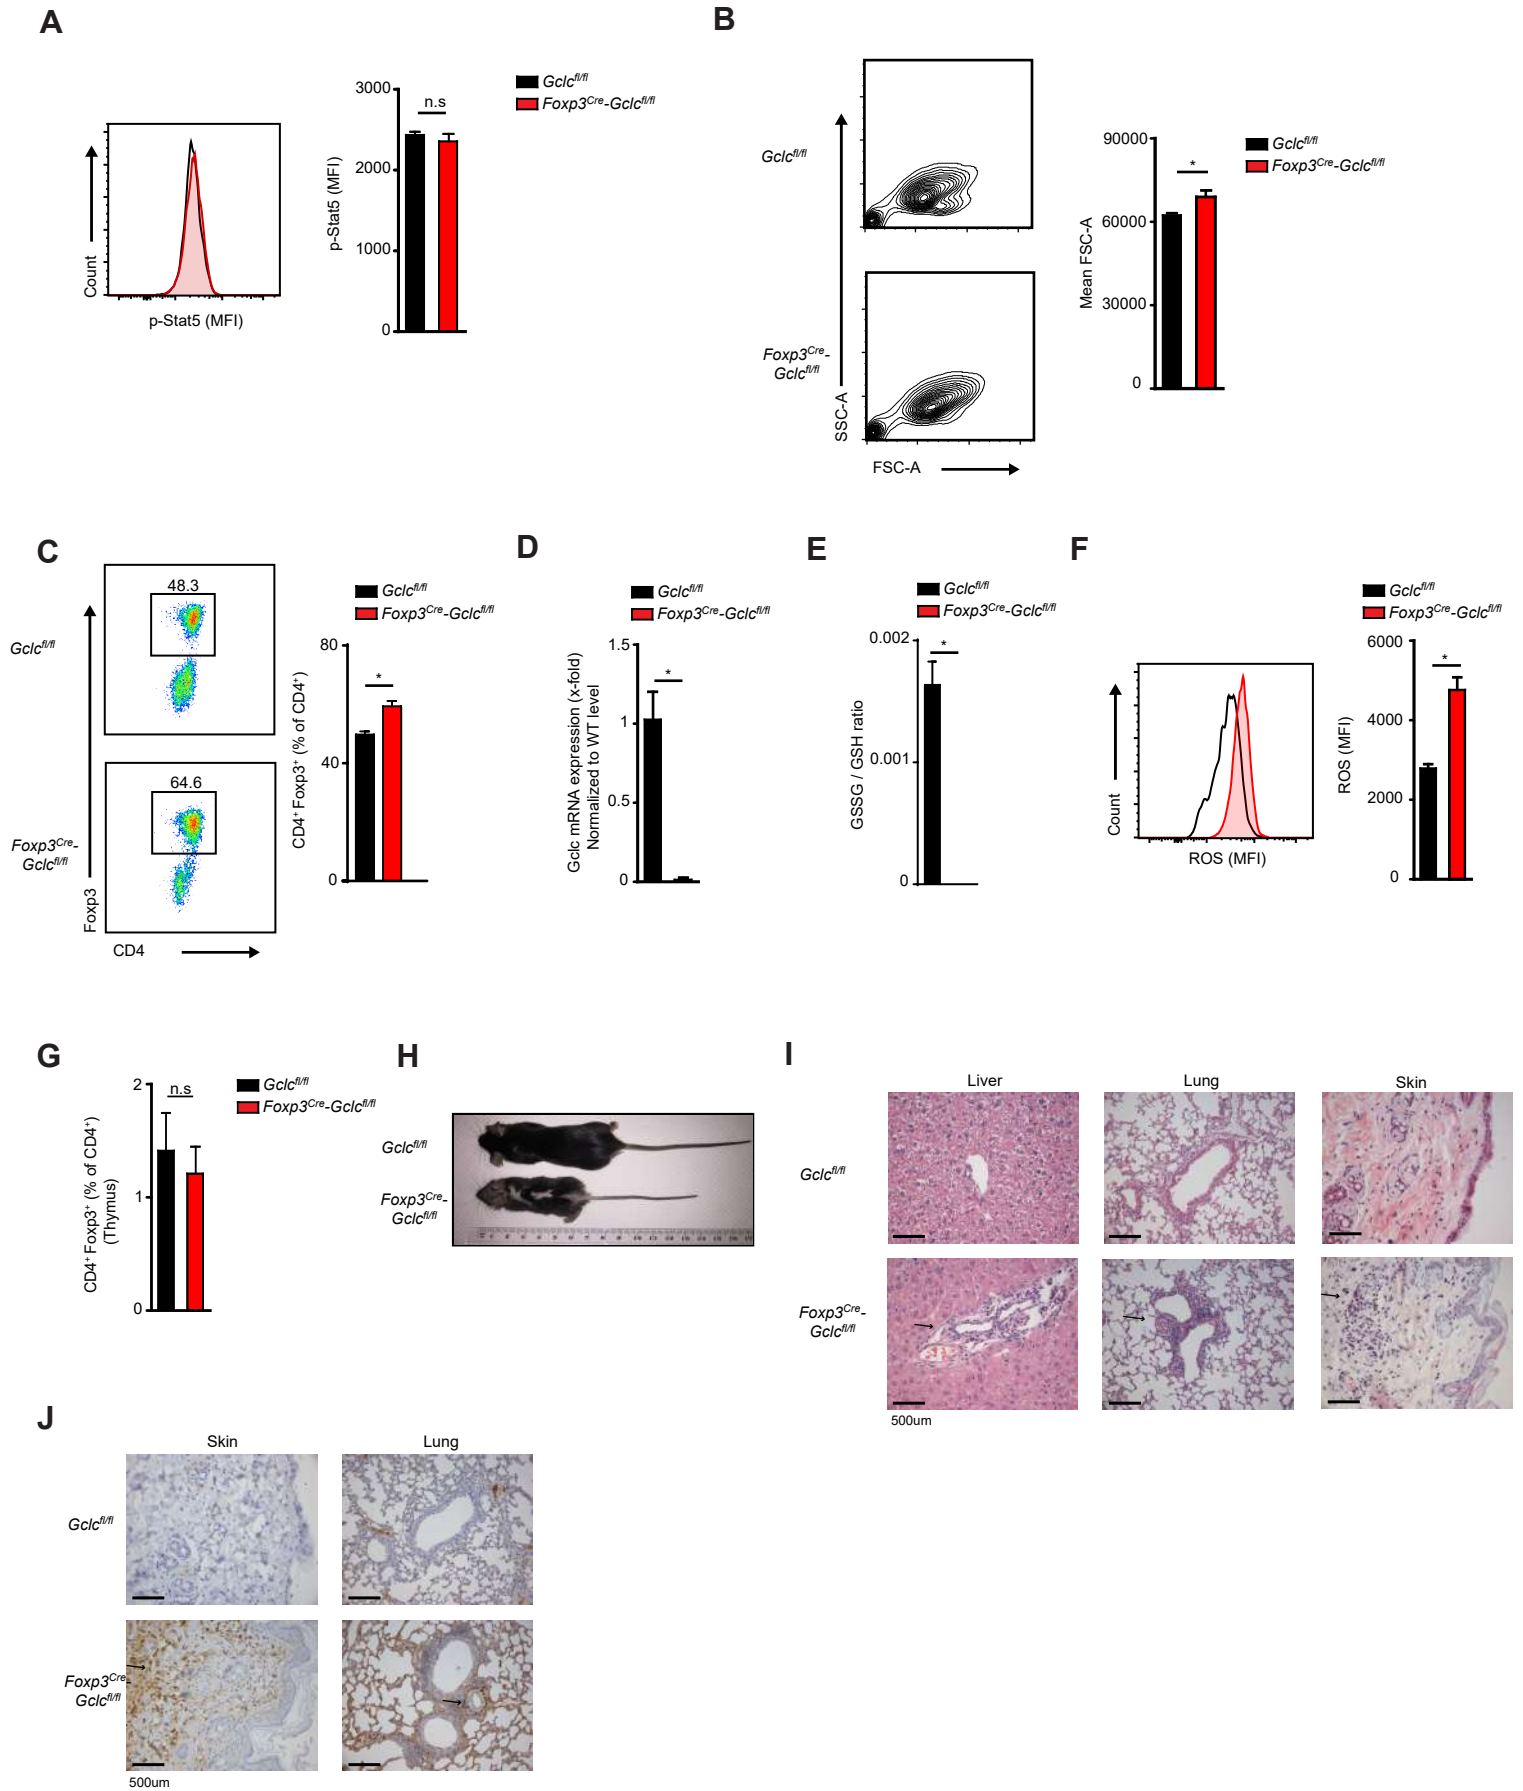

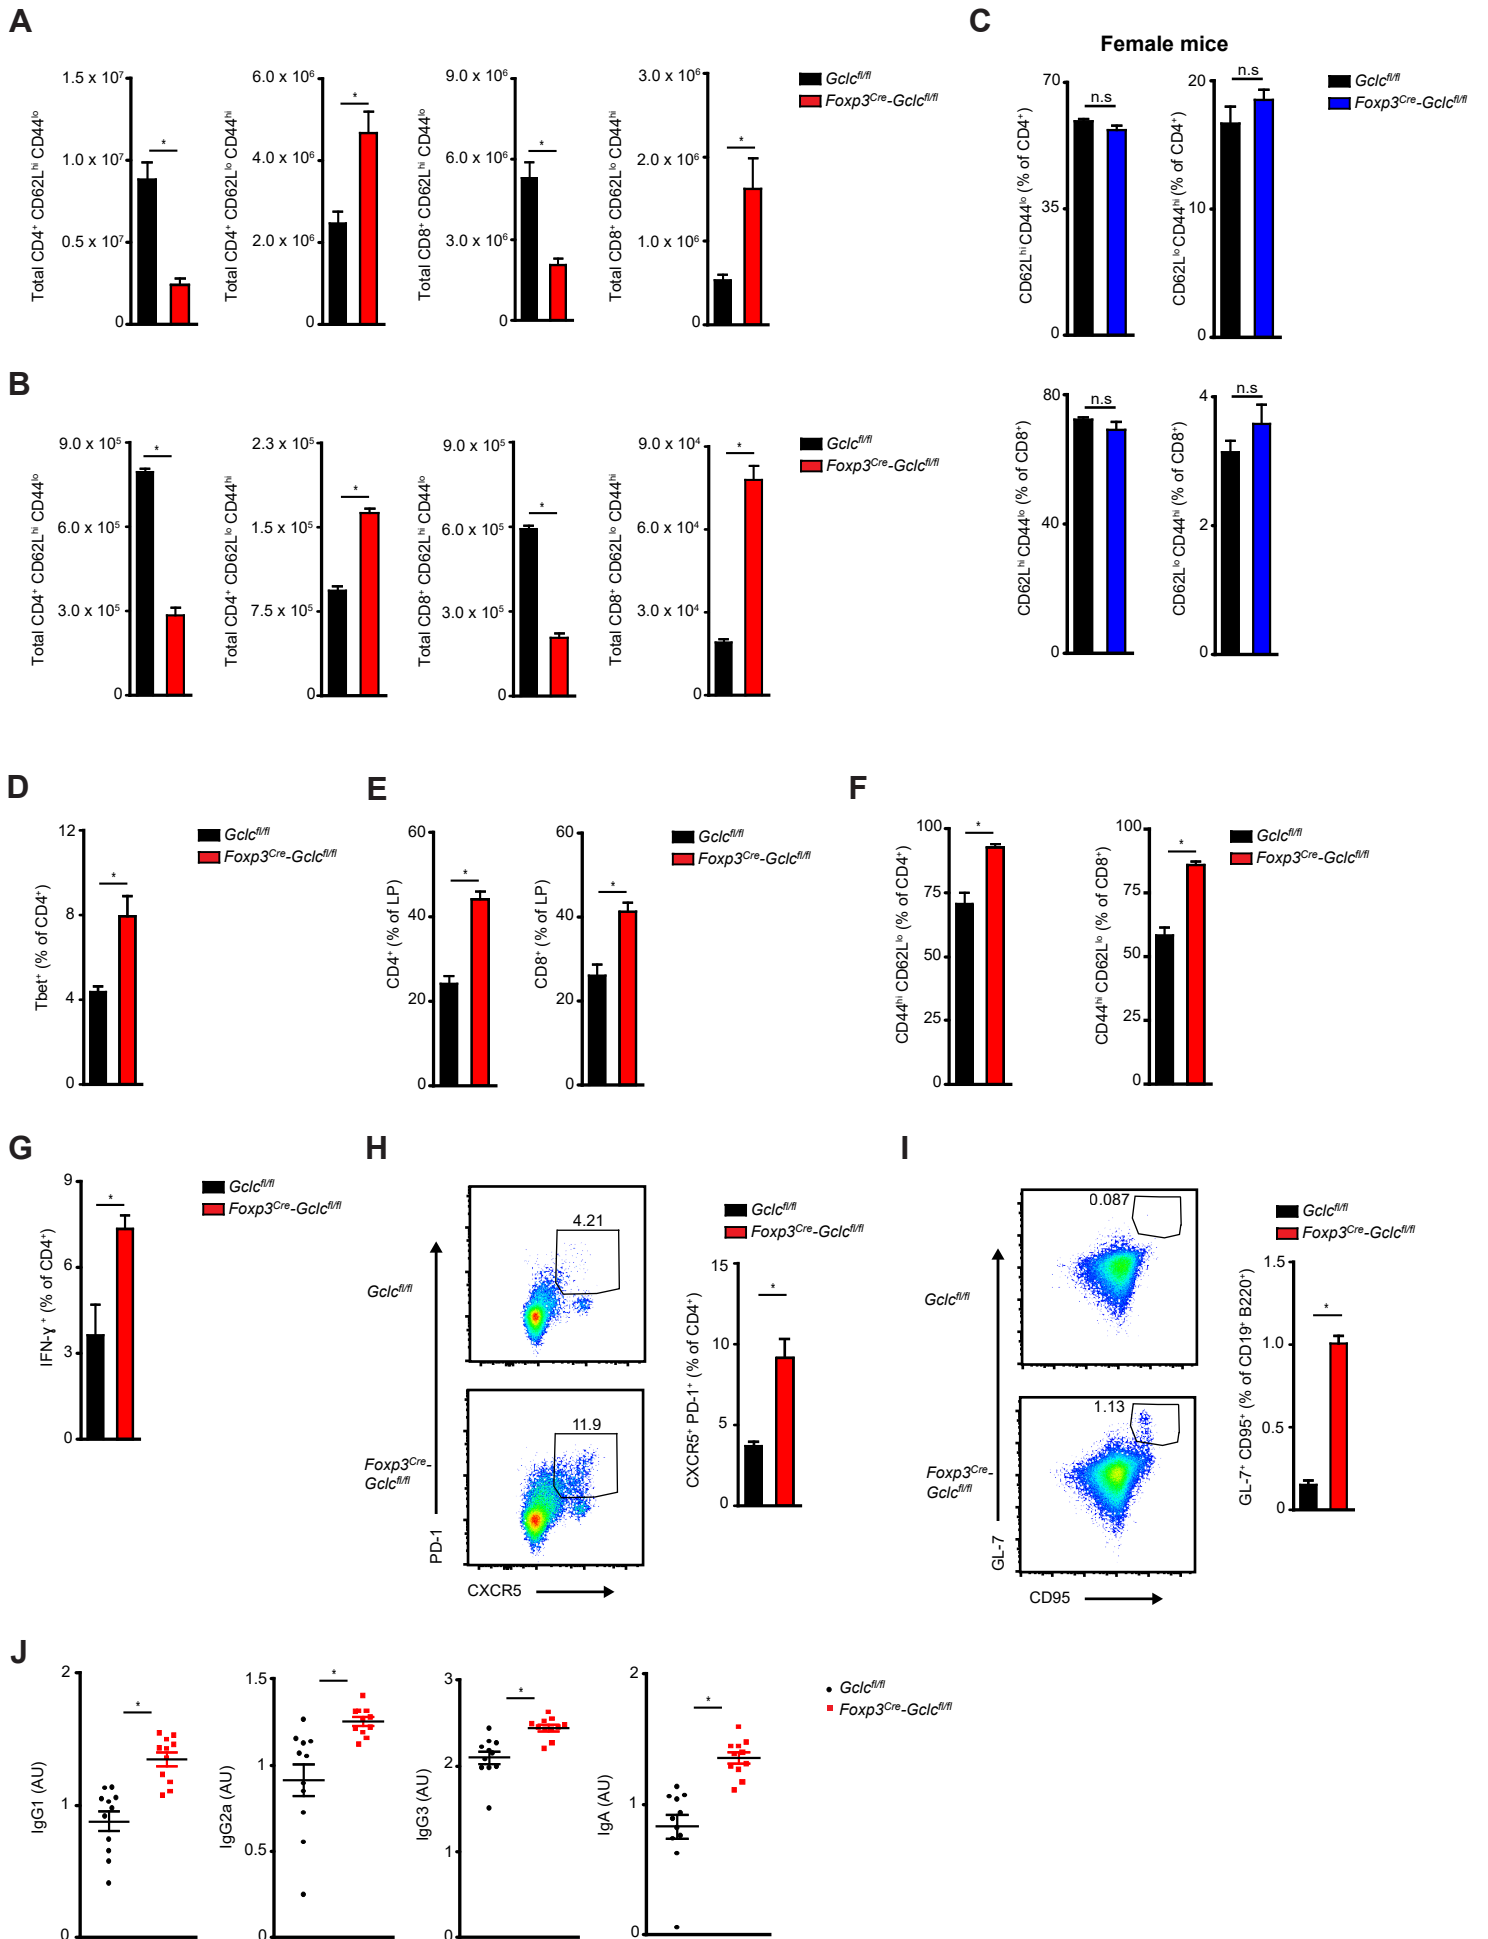



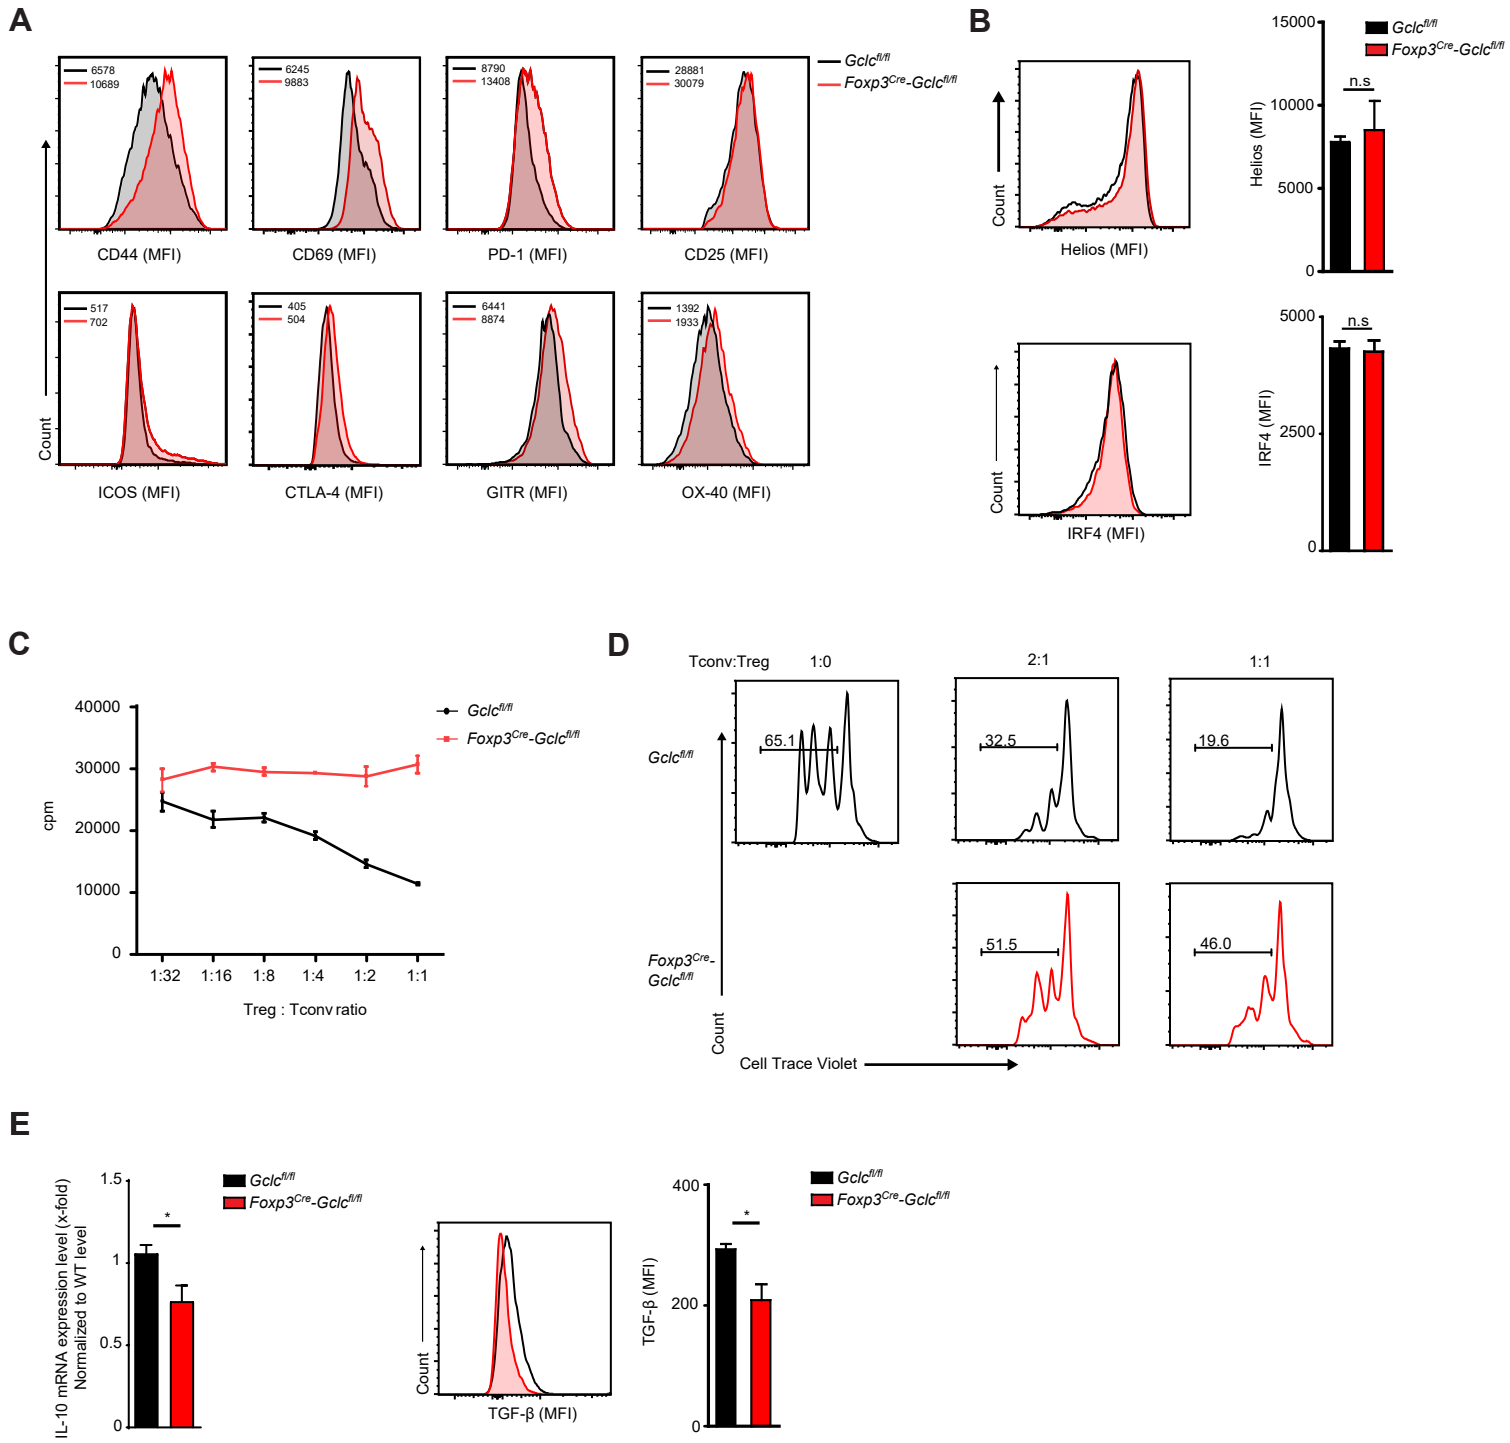

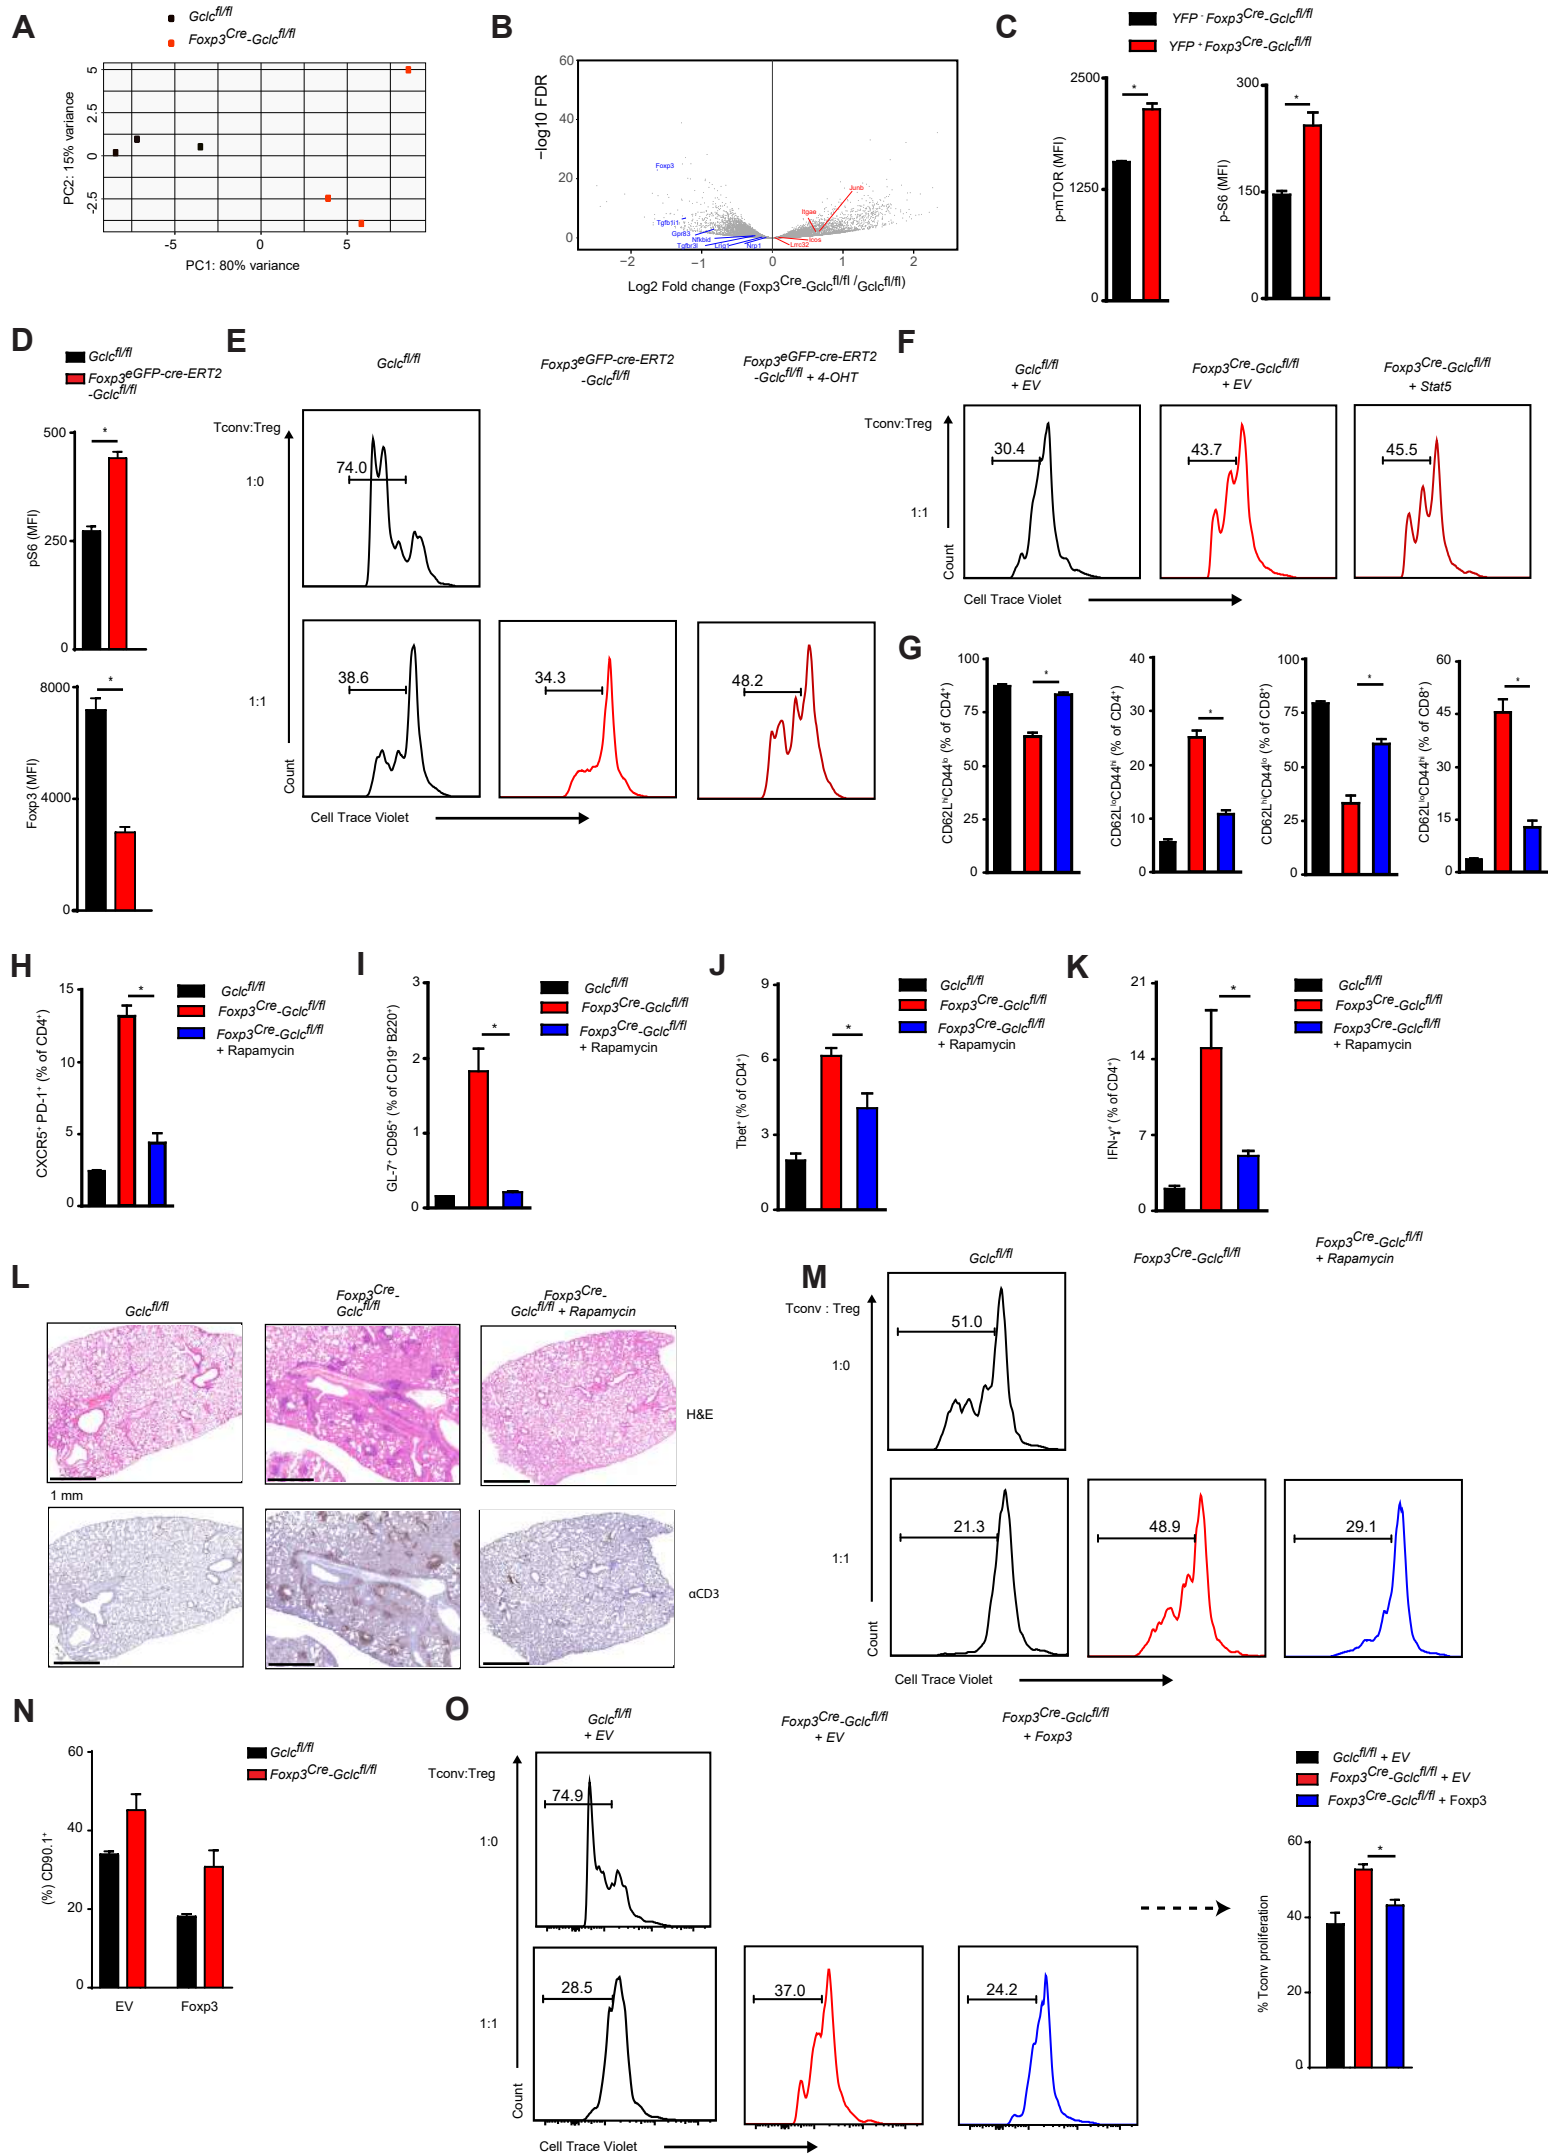

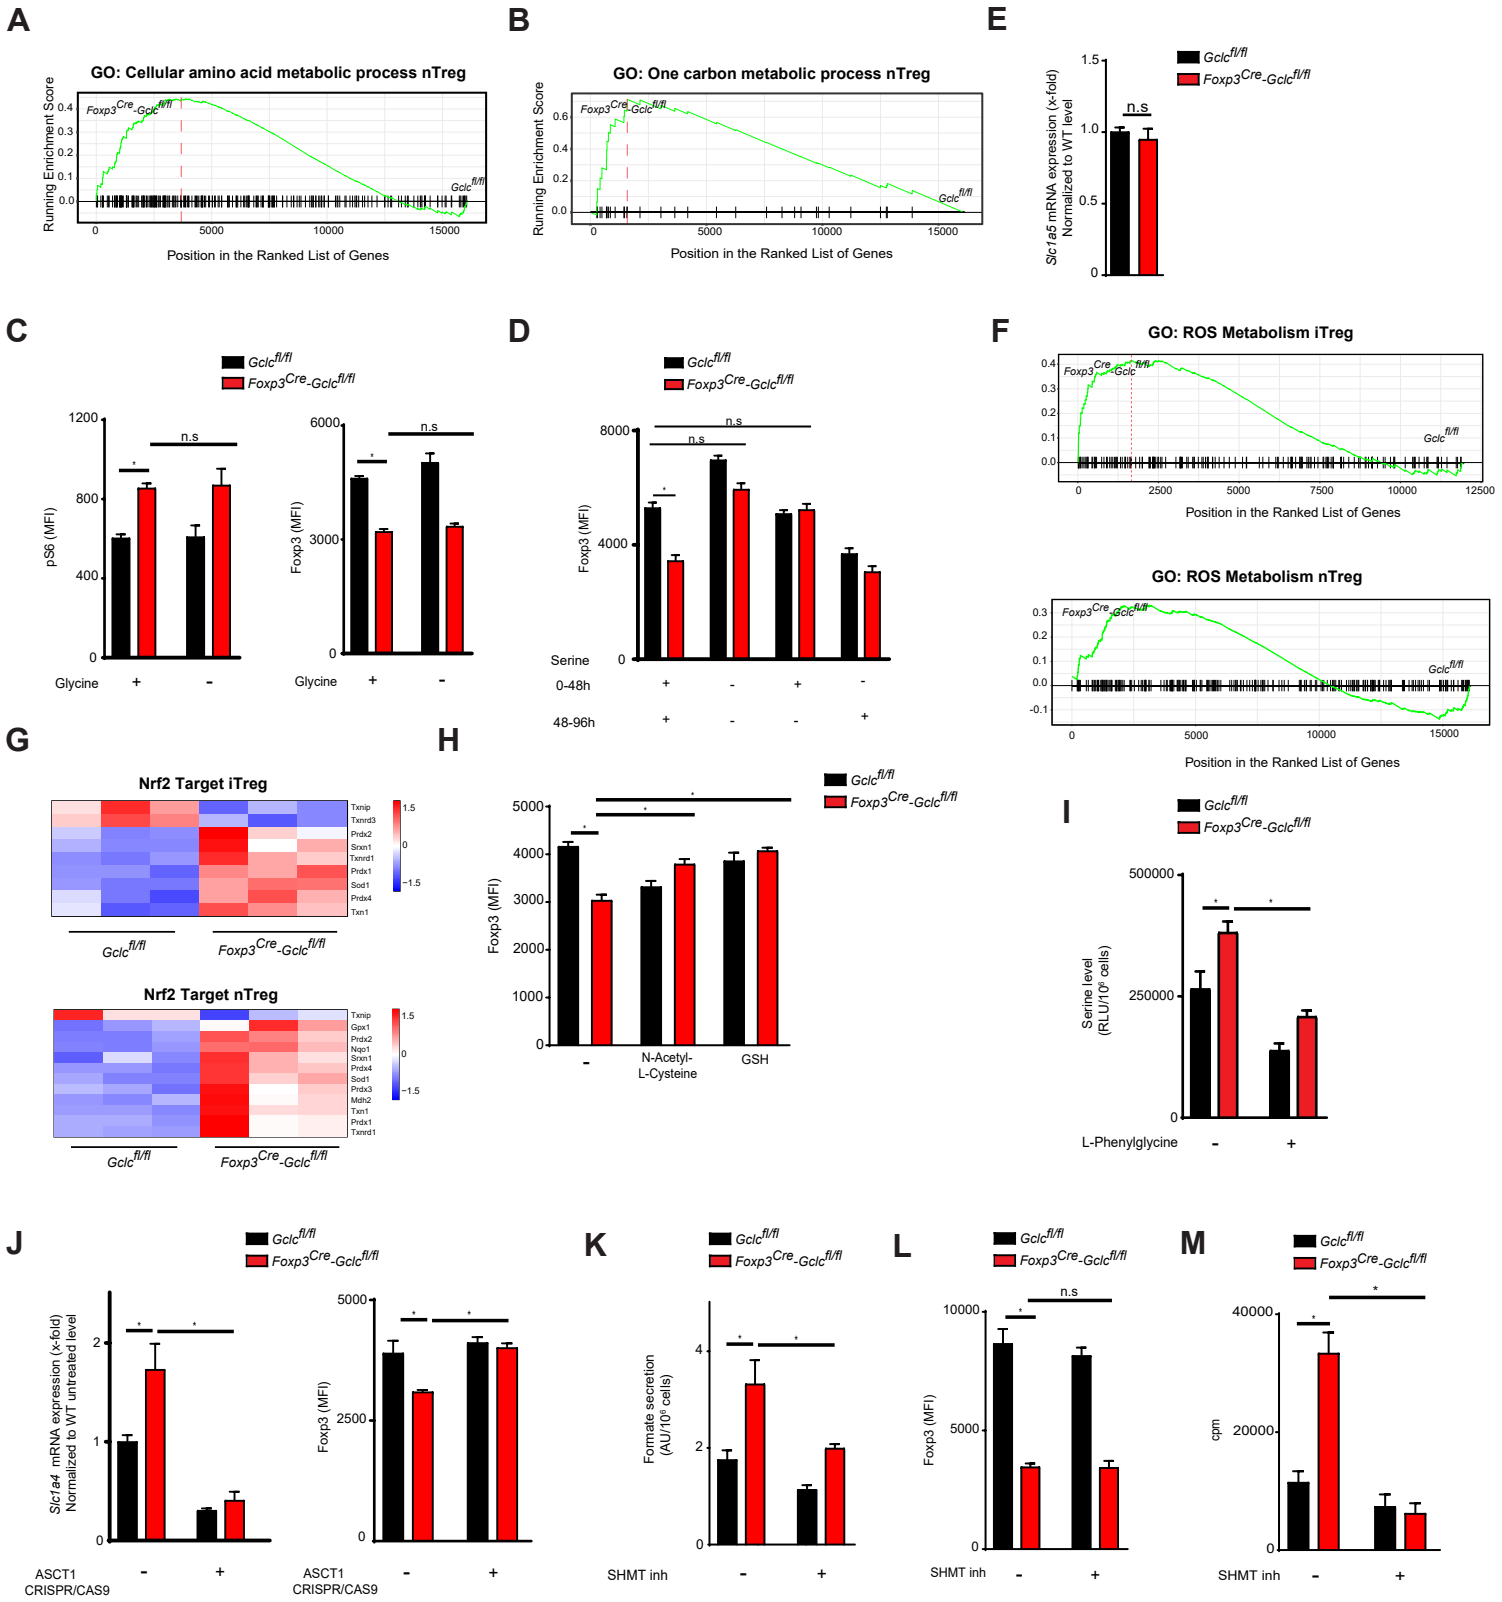

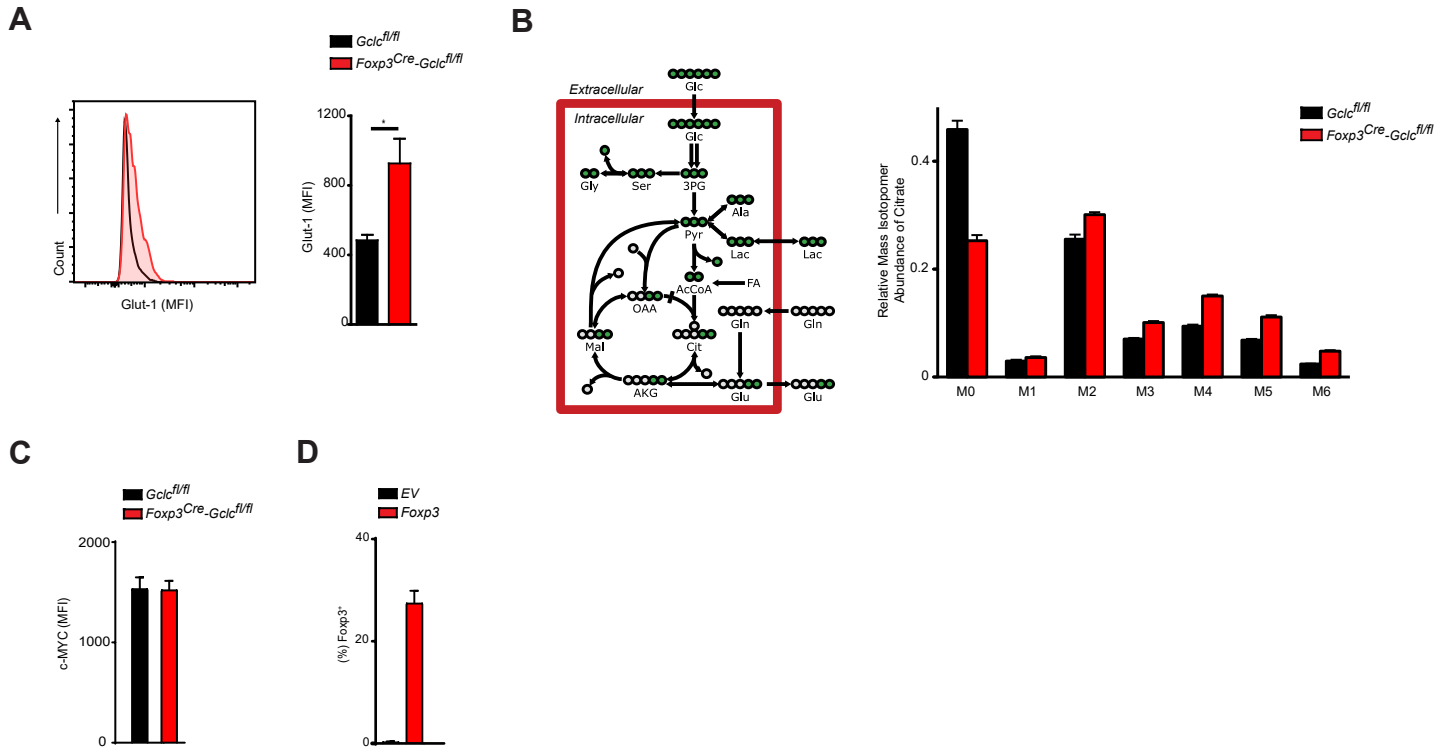

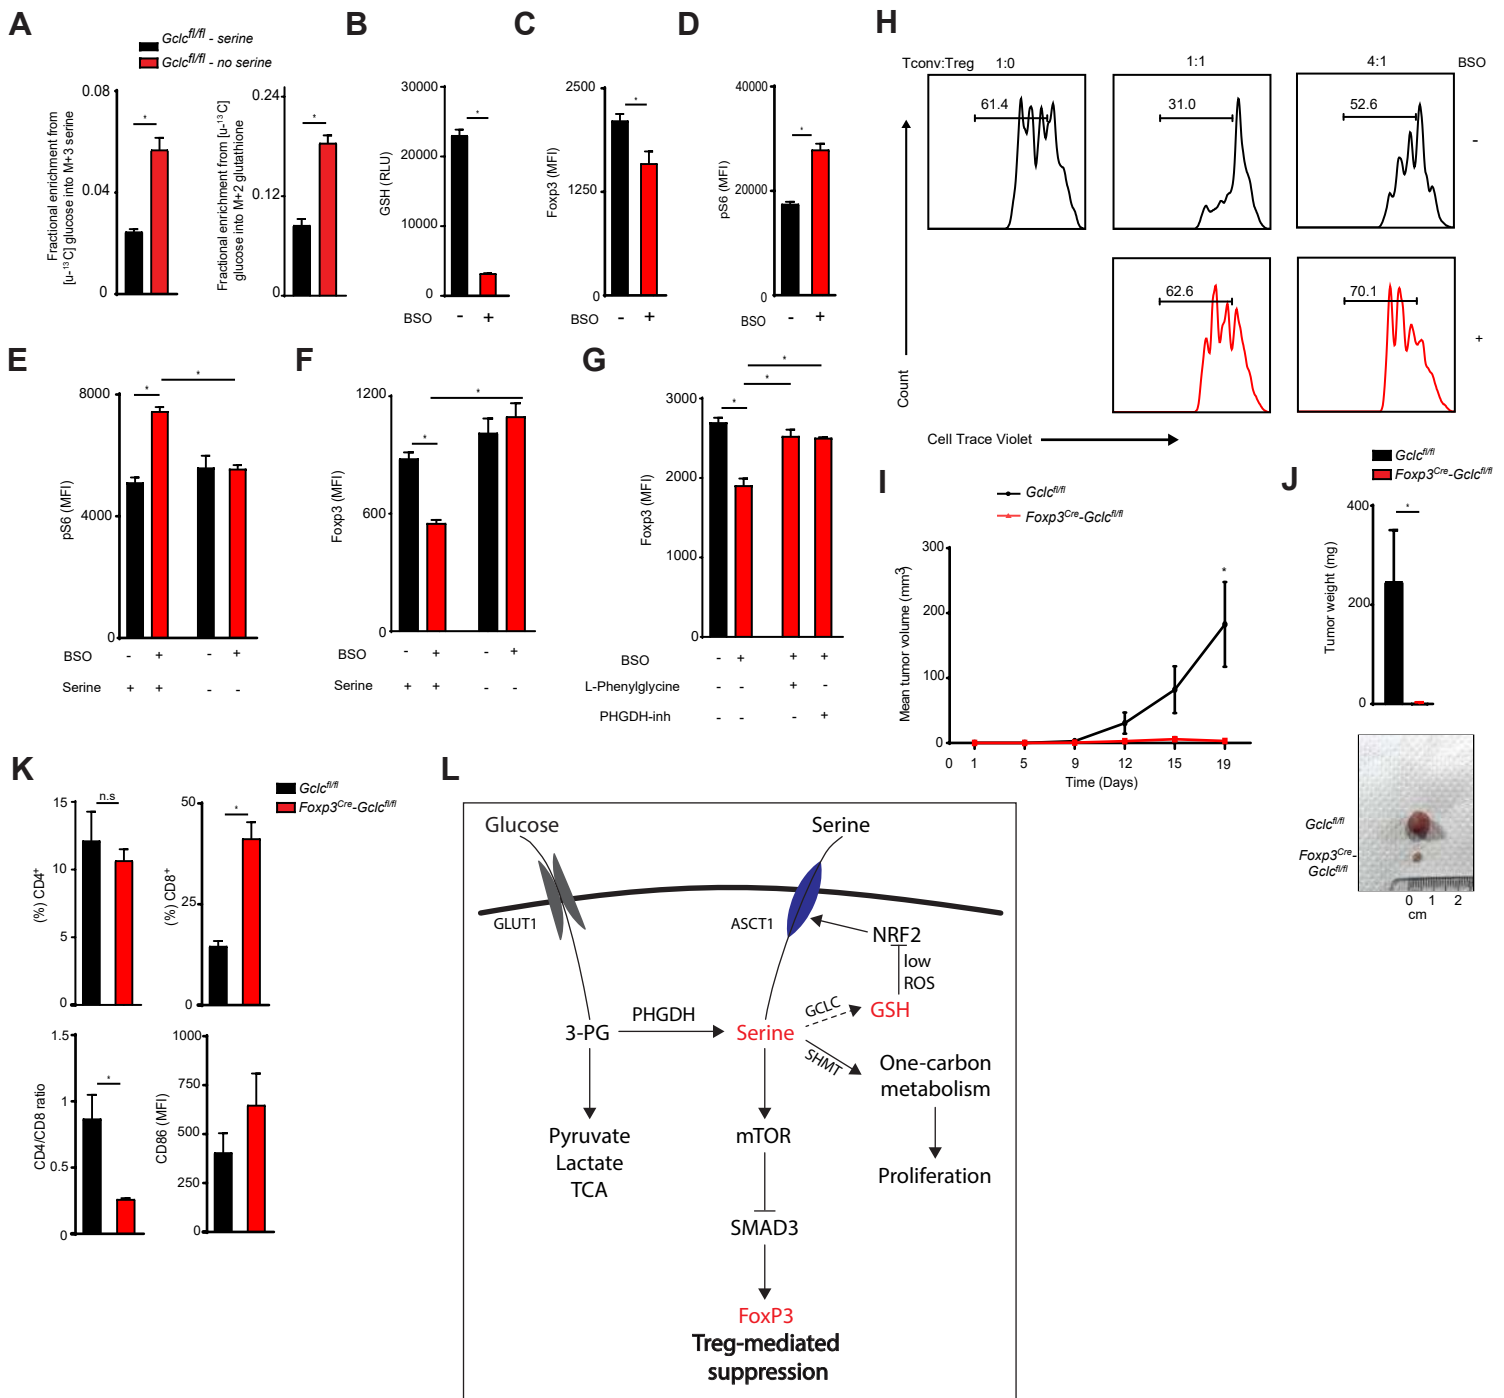

Supplement: NIHMS1574821-supplement-1.pdf [file NIHMS1574821-supplement-1.pdf]
